# Supplementary material for: Hyperspectral Reflectance and Machine Learning Approaches for the Detection of Drought and Root–Knot Nematode Infestation in Cotton
Source: MDPI journal article supplement (doi:10.3390/rs14164021), 2022-08-18
Supplement: s1 [file s1]

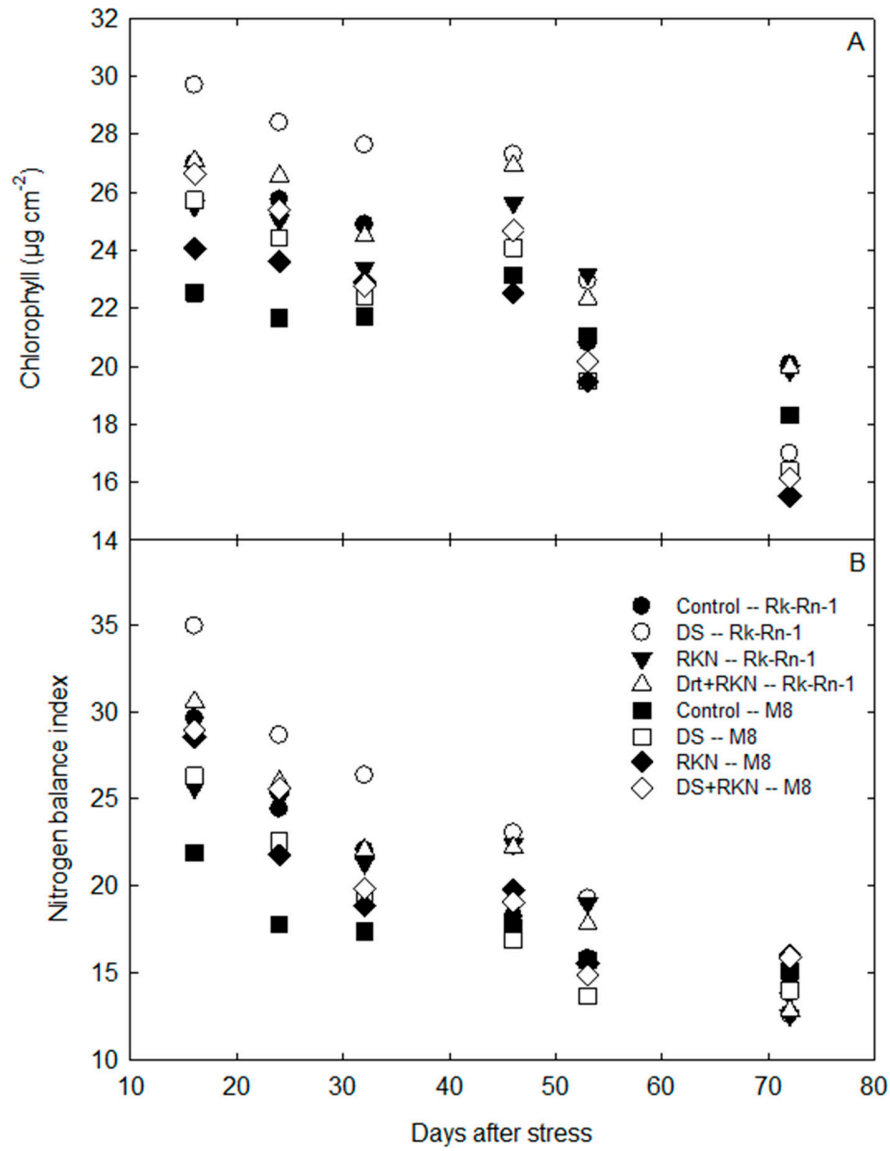

Figure S1: Drought and nematode infection effect on chlorophyll content (A) and nitrogen balance index (B) of cotton genotypes (Rk-Rn-1 and M8) measured at 16, 24, 32, 46, 53 and 72 days after stress treatment under control, drought stress (DS), nematode stress (RKN), and DS+RKN combination in 2021.

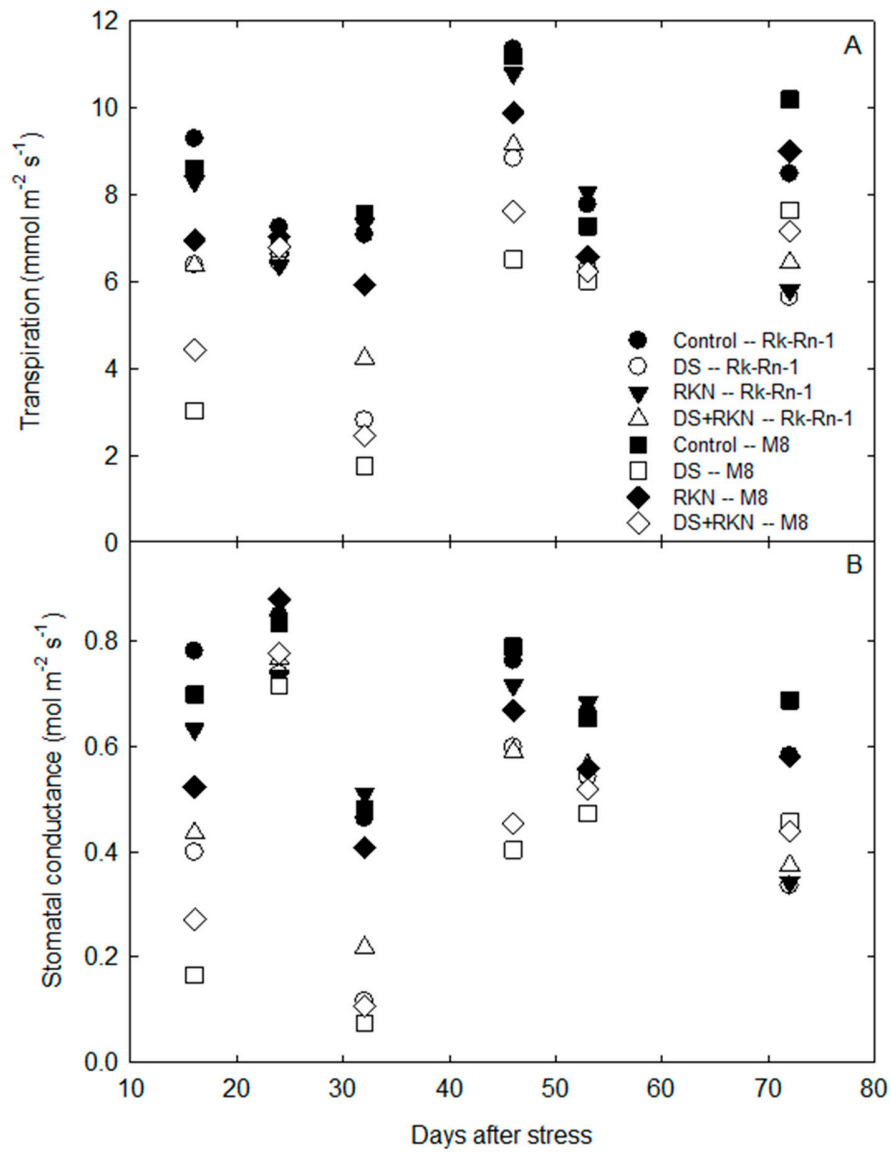

Figure S2: Drought and nematode infection effect on transpiration (A) and stomatal conductance (B) of cotton genotypes (Rk-Rn-1 and M8) measured at 16, 24, 32, 46, 53 and 72 days after stress treatment under control, drought stress (DS), nematode stress (RKN), and DS+RKN combination in 2021.

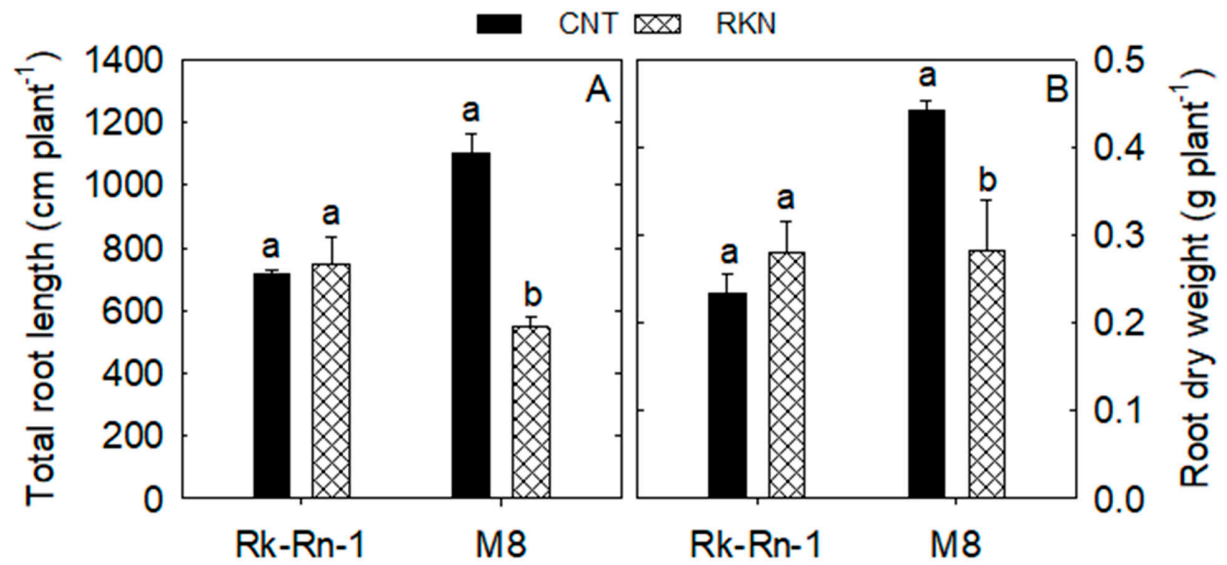

Figure S3: Drought and nematode infection effect on total root length (A) and root dry weight (B) of cotton genotypes (Rk-Rn-1 and M8) measured under control (CNT) and nematode stress (RKN) in 2020. Means followed by a common letter are not significantly different by Duncan's multiple range test at the 5% level of significance. Vertical bars denote mean  $\pm$  SE.
